# Supplementary material for: Catalyzed Ester Synthesis UsingCandida rugosaLipase Entrapped by Poly(N-isopropylacrylamide-co-itaconic Acid) Hydrogel
Source: Hindawi journal article supplement (doi:10.1155/2014/142123), 2014-01-01
Supplement: f1 [file 142123.f1.pdf]

Supplementary Table 1. The effect of temperature on lipase activity after entrapment (xerogels swelling in lipase pH 7.00 ± 0.01 buffer solution of concentration of 1.0 mg<sub>enz</sub>/mL).

| <i>Sample</i> | <i>t = 5 °C</i>                          |                            |             | <i>t = 25 °C</i>                         |                            |             | <i>t = 37 °C</i>                         |                            |             |
|---------------|------------------------------------------|----------------------------|-------------|------------------------------------------|----------------------------|-------------|------------------------------------------|----------------------------|-------------|
|               | <i>IU/g<sup>milled</sup><br/>xerogel</i> | <i>IU/mg<sub>enz</sub></i> | <i>Y, %</i> | <i>IU/g<sup>milled</sup><br/>xerogel</i> | <i>IU/mg<sub>enz</sub></i> | <i>Y, %</i> | <i>IU/g<sup>milled</sup><br/>xerogel</i> | <i>IU/mg<sub>enz</sub></i> | <i>Y, %</i> |
| 85/15/2/0     | 34.20                                    | 0.171                      | 28.5        | 30.60                                    | 0.153                      | 25.5        | 21.20                                    | 0.106                      | 17.7        |
| 90/10/2/0     | 29.40                                    | 0.147                      | 24.2        | 25.80                                    | 0.129                      | 21.5        | 10.60                                    | 0.053                      | 8.8         |
| 95/5/2/0      | 24.20                                    | 0.121                      | 20.7        | 16.20                                    | 0.081                      | 13.5        | 5.20                                     | 0.026                      | 4.3         |
| 100/0/2/0     | 23.60                                    | 0.118                      | 19.7        | 10.80                                    | 0.054                      | 9.0         | 2.00                                     | 0.010                      | 1.7         |
| 85/15/4/0     | 31.40                                    | 0.157                      | 26.2        | 24.80                                    | 0.124                      | 20.7        | 15.60                                    | 0.078                      | 13.0        |
| 90/10/4/0     | 28.60                                    | 0.143                      | 23.8        | 17.20                                    | 0.086                      | 14.3        | 8.20                                     | 0.041                      | 6.8         |
| 95/5/4/0      | 21.20                                    | 0.106                      | 17.7        | 10.80                                    | 0.054                      | 9.0         | 3.60                                     | 0.018                      | 3.0         |
| 100/04/0      | 9.80                                     | 0.049                      | 8.2         | 5.40                                     | 0.027                      | 4.5         | 0.60                                     | 0.003                      | 0.5         |

Supplementary Table 2. The effect of buffer solution pH on the activity of entrapped lipase (xerogels swelling was performed at 5 °C in lipase pH 7.00 ± 0.01 buffer solution of concentration of 1.0 mg<sub>enz</sub>/mL).

| <i>pH</i> | <i>Sample</i> | <i>IU/g<sub>milled</sub></i><br><i>xerogel</i> | <i>IU/mg<sub>enz</sub></i> | <i>Y, %</i> |
|-----------|---------------|------------------------------------------------|----------------------------|-------------|
| 6.04      | 90/10/2/0     | 13.60                                          | 0.068                      | 11.3        |
|           | 95/5/2/0      | 6.40                                           | 0.032                      | 5.3         |
|           | 95/5/4/0      | 3.40                                           | 0.017                      | 2.8         |
| 7.00      | 90/10/2/0     | 29.00                                          | 0.145                      | 24.2        |
|           | 95/5/2/0      | 24.80                                          | 0.124                      | 20.7        |
|           | 95/5/4/0      | 21.40                                          | 0.107                      | 17.8        |
| 8.00      | 90/10/2/0     | 22.00                                          | 0.110                      | 18.3        |
|           | 95/5/2/0      | 20.00                                          | 0.100                      | 16.7        |
|           | 95/5/4/0      | 8.60                                           | 0.043                      | 7.2         |
| 8.99      | 90/10/2/0     | /                                              | /                          | < 1.0       |
|           | 95/5/2/0      | /                                              | /                          | < 1.0       |
|           | 95/5/4/0      | /                                              | /                          | < 1.0       |

Supplementary Table 3. The effect of lipase concentration in the solution on the entrapped lipase activity (xerogels swelling was performed at 5 °C and in a CRL solution of pH 7.00 ± 0.01).

| <i>CRL solution concentration, mg/mL</i> | <i>Sample</i> | <i>IU/g<sub>milled</sub> xerogel</i> | <i>IU/mg<sub>enz</sub></i> | <i>Y, %</i> |
|------------------------------------------|---------------|--------------------------------------|----------------------------|-------------|
| 0.2                                      | 90/10/2/0     | 12.20                                | 0.061                      | 10.2        |
|                                          | 95/5/2/0      | 10.80                                | 0.054                      | 9.0         |
|                                          | 95/5/4/0      | 5.80                                 | 0.029                      | 4.8         |
| 1.0                                      | 90/10/2/0     | 29.00                                | 0.145                      | 24.2        |
|                                          | 95/5/2/0      | 24.80                                | 0.124                      | 20.7        |
|                                          | 95/5/4/0      | 21.40                                | 0.107                      | 17.8        |
| 5.0                                      | 90/10/2/0     | 63.20                                | 0.316                      | 52.7        |
|                                          | 95/5/2/0      | 39.60                                | 0.198                      | 33.0        |
|                                          | 95/5/4/0      | 27.80                                | 0.139                      | 23.2        |
| 10.0                                     | 90/10/2/0     | 65.00                                | 0.325                      | 54.2        |
|                                          | 95/5/2/0      | 46.00                                | 0.230                      | 38.3        |
|                                          | 95/5/4/0      | 39.20                                | 0.196                      | 32.7        |
| 20.0                                     | 90/10/2/0     | 62.80                                | 0.314                      | 52.3        |
|                                          | 95/5/2/0      | 45.40                                | 0.227                      | 37.8        |
|                                          | 95/5/4/0      | 39.00                                | 0.195                      | 32.5        |
